---

# Standards and Guidelines in Urological Oncology

---

Editors

*M.P. Wirth*, Dresden

*K. Miller*, Berlin

*H.-P. Schmid*, Münster

14 figures, 1 in color and 48 tables, 1999

**KARGER**

Basel · Freiburg · Paris · London · New York ·  
New Delhi · Bangkok · Singapore · Tokyo · Sydney

S. Karger  
Medical and Scientific Publishers  
Basel • Freiburg • Paris • London  
New York • New Delhi • Bangkok  
Singapore • Tokyo • Sydney

#### Drug Dosage

The authors and the publisher have exerted every effort to ensure that drug selection and dosage set forth in this text are in accord with current recommendations and practice at the time of publication. However, in view of ongoing research, changes in government regulations, and the constant flow of information relating to drug therapy and drug reactions, the reader is urged to check the package insert for each drug for any change in indications and dosage and for added warnings and precautions. This is particularly important when the recommended agent is a new and/or infrequently employed drug.

All rights reserved.

No part of this publication may be translated into other languages, reproduced or utilized in any form or by any means, electronic or mechanical, including photocopying, recording, microcopying, or by any information storage and retrieval system, without permission in writing from the publisher or, in the case of photocopying, direct payment of a specified fee to the Copyright Clearance Center (see 'General Information').

© Copyright 1999 by S. Karger AG,  
P.O. Box, CH-4009 Basel (Switzerland)  
Printed in Switzerland on acid-free paper by  
Reinhardt Druck, Basel  
ISBN 3-8055-7023-6

---

**KARGER**

Fax+ 41 61 306 12 34  
E-Mail [karger@karger.ch](mailto:karger@karger.ch)  
[www.karger.com](http://www.karger.com)

## Contents

### 5 Editorial

Wirth, M.P. (Dresden); Miller, K. (Berlin); Schmid, H.-P. (Münster)

---

#### Renal Cell Carcinoma

- 6 **Renal Cell Carcinoma.** Guidelines for Diagnosis and Treatment  
Miller, K. (Berlin)

- 10 **Operative Therapy in Disease Progression and Local Recurrence of Renal Cell Carcinoma**  
Fischer, C.G. (Giessen); Schmid, H.-P. (Münster)

- 16 **Immunotherapy of Renal Cell Carcinoma.** A Critical Appraisal from a Urologist's Point of View  
Mickisch, G.H. (Rotterdam)

---

#### Bladder Cancer

- 22 **Tumor-Adopted Diagnosis of Bladder Cancer**  
Brauers, A.; Jung, P.; Jakse, G. (Aachen)

- 27 **5-Aminolevulinic Acid-Induced Fluorescence Endoscopy for the Detection of Lower Urinary Tract Tumors**  
Kriegmair, M. (Ebersberg); Zaak, D.; Knuechel, R. (Regensburg); Baumgartner, R.; Hofstetter, A. (Munich)

- 32 **Therapy of Superficial Bladder Carcinomas**  
Otto, T.; Kregge, S. (Essen); Noll, F. (Würselen); Rübber, H. (Essen)

- 40 **Follow-Up after Urinary Diversion**  
Fichtner, J. (Mainz)

---

#### Germ Cell Tumours

- 46 **Guidelines for the Diagnosis and Therapy of Testicular Cancer and New Developments**  
Weißbach, L. (Berlin)

- 57 Diagnosis and Staging of Prostatic Carcinoma: What Is Really Necessary?**  
Schmid, H.-P.; Oberpenning, F. (Münster); Pummer, K. (Graz)
- 62 Prognostic Factors for Carcinoma of the Prostate**  
Altwein, J.E.; Luboldt, H.J. (Munich)
- 72 Curative Treatment of Prostate Cancer**  
Wirth, M.P.; Hakenberg, O.W. (Dresden)
- 80 Hormonal Therapy of Prostate Cancer: Is There Any News?**  
Pummer, K. (Graz); Schmid, H.-P. (Münster); Trummer, H.; Augustin, H.; Hubner, G. (Graz)
- 86 Author and Subject Index**
